# Supplementary material
Source: PubMed Central journal article supplement (PMC2897390)

**A)**

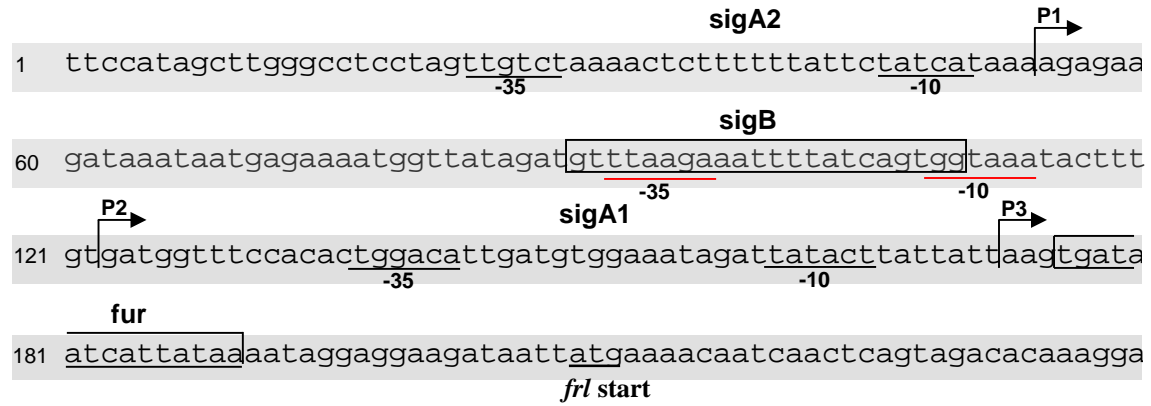

**B)**

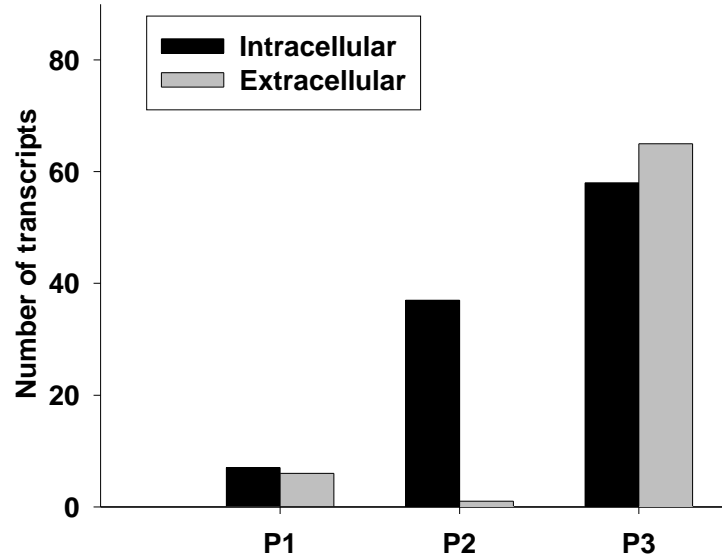

**C)**

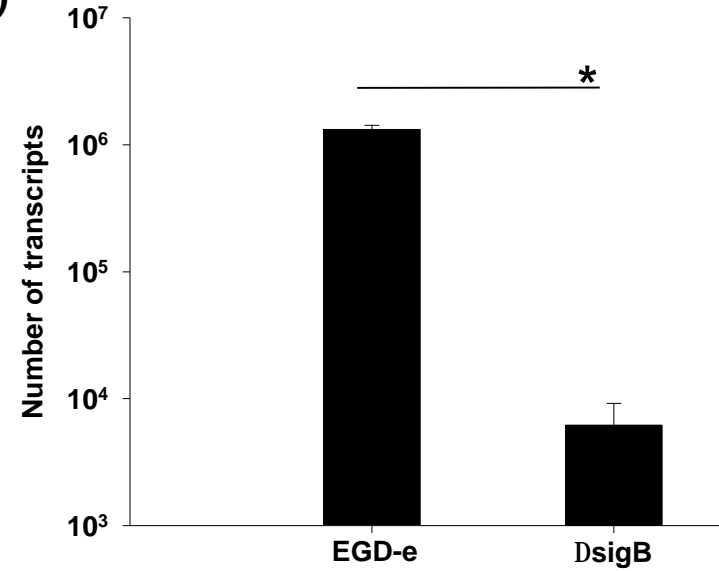

**(Figure S2)**

Supplement: supp_78_7_3306__2.pdf [file supp_78_7_3306__2.pdf]
